# Supplementary material
Source: PubMed Central journal article supplement (PMC2573861)
Supplement: NIHMS71540-supplement-01.pdf [file NIHMS71540-supplement-01.pdf]

Supplementary Material

Table S1. Percent Identity/Similarity of insect MCOs

|                 | 1    | 2    | 3    | 4    | 5    | 6    | 7    | 8    | 9    | 10   | 11   | 12   | 13   | 14   |
|-----------------|------|------|------|------|------|------|------|------|------|------|------|------|------|------|
| 1 AgMCO1        |      | 71.9 | 44.9 | 51.2 | 55.5 | 51.7 | 47.9 | 36.7 | 36.7 | 36.5 | 36.2 | 35.6 | 35.8 | 36.5 |
| 2 AaAAEL007802  | 83.3 |      | 47.8 | 55.8 | 55.2 | 54.1 | 51.7 | 37   | 37.3 | 36.7 | 36.7 | 35.9 | 36   | 37.1 |
| 3 AmLOC724890   | 58.1 | 62.9 |      | 53   | 44.6 | 51.8 | 52.9 | 34.9 | 34.7 | 34.2 | 35.2 | 34.7 | 34.6 | 35.1 |
| 4 BmMCO1        | 65.1 | 69.2 | 67.7 |      | 51.3 | 89   | 56.6 | 39.4 | 39.6 | 38.3 | 39.4 | 38.6 | 39.3 | 38.8 |
| 5 DmCG3759      | 71.8 | 74.7 | 59.1 | 67   |      | 53.4 | 48.6 | 36   | 35.8 | 35.6 | 34.7 | 35.5 | 35.1 | 35.9 |
| 6 MsLac1        | 65   | 69.8 | 67.2 | 96.4 | 67.7 |      | 55.6 | 38.9 | 38.8 | 38.2 | 37.8 | 38   | 38.3 | 38   |
| 7 TcLac1        | 63   | 66.4 | 68.3 | 73.9 | 65   | 72.2 |      | 39.3 | 38.8 | 38.1 | 38.4 | 38.7 | 38.2 | 39.2 |
| 8 AgMCO2A       | 55   | 57   | 53.6 | 62.7 | 55.3 | 62.7 | 62   |      | 97.6 | 84.2 | 87.6 | 93.3 | 87   | 86.4 |
| 9 AaLac1        | 54.3 | 56.4 | 53.4 | 62.9 | 55.6 | 62.9 | 61.5 | 98.8 |      | 84.1 | 87.8 | 93.1 | 87   | 86.4 |
| 10 AmLOC410365  | 53.2 | 55.3 | 52.2 | 61.7 | 54.8 | 60.6 | 60.1 | 93.8 | 93.1 |      | 83.8 | 83.6 | 82.6 | 84.1 |
| 11 BmLac2       | 53.8 | 56.5 | 53.3 | 63.2 | 55.2 | 62   | 61.5 | 94.6 | 94.5 | 92.6 |      | 88   | 95.8 | 86.5 |
| 12 DmCG30437-PA | 54.1 | 56.2 | 53.3 | 62   | 55.3 | 61.8 | 61.8 | 97.5 | 97   | 93.5 | 93.3 |      | 86.6 | 87.4 |
| 13 MsLac2       | 53.5 | 56.2 | 52.7 | 62.9 | 54.2 | 61.2 | 61.2 | 93.8 | 93.3 | 91.8 | 97.8 | 92.6 |      | 85.3 |
| 14 TcLac2A      | 54.5 | 57.5 | 52.7 | 61.7 | 55.3 | 61.1 | 61.4 | 94.6 | 94.3 | 92.4 | 93.8 | 94.3 | 93.5 |      |
| 15 AgMCO3       | 51.9 | 53.6 | 52.8 | 58.5 | 54.2 | 57.5 | 58.5 | 61.3 | 60.8 | 61.6 | 62.4 | 60.6 | 62   | 61.8 |
| 16 AgMCO4       | 51   | 53.5 | 52.7 | 58.5 | 52.9 | 57.2 | 57.2 | 61   | 61.2 | 61   | 61   | 59.8 | 60   | 59.8 |
| 17 AgMCO5       | 51   | 53.5 | 50.7 | 57.1 | 51.7 | 57.3 | 55.7 | 60.4 | 59.9 | 59.8 | 58.9 | 59.9 | 58.1 | 60.3 |
| 18 AaLac2       | 52.5 | 55.3 | 53.6 | 57.8 | 53.5 | 57.3 | 56.4 | 61.8 | 61.6 | 61.4 | 61.6 | 61.9 | 60.9 | 61.8 |
| 19 AaAAEL001632 | 53.2 | 55   | 52.1 | 59.2 | 53.8 | 58.5 | 57.4 | 62.5 | 63   | 61.3 | 62.8 | 62.6 | 62   | 62.3 |
| 20 AaAAEL001640 | 50.6 | 53   | 51.9 | 56.6 | 53.6 | 55.6 | 55.3 | 59.8 | 59.8 | 58.9 | 59.8 | 59.4 | 58.9 | 59.4 |
| 21 AmLOC552811  | 48.2 | 52.2 | 51.7 | 57.5 | 50.3 | 57.5 | 56.3 | 64.4 | 64.2 | 62.8 | 64.5 | 63.7 | 64   | 64.3 |
| 22 PhLac1       | 52.6 | 54.4 | 51   | 57.3 | 54.7 | 57.2 | 54.8 | 66.5 | 66.7 | 66.8 | 66.3 | 66.3 | 66.3 | 66.8 |
| 23 DmCG5959     | 51.8 | 52.9 | 52.4 | 55.5 | 52   | 55.8 | 56   | 55.1 | 55.1 | 52.5 | 54.8 | 54.5 | 54.2 | 54.9 |
| 24 DmCG32557    | 49.6 | 53.3 | 52.3 | 55.7 | 50.8 | 54.7 | 56   | 52.6 | 52.9 | 53.4 | 53.3 | 52.9 | 51.8 | 53.2 |

The matrix was generated using the MatGAT v2.0 program (Campanella et al., 2003)

Percent identity is given above the diagonal and percent similarity below.

The MCO1 group is highlighted in yellow, the MCO2 group is highlighted in blue, and the mosquito-specific group is highlighted in rose.

Table S1 (continued)

|                 | 15   | 16   | 17   | 18   | 19   | 20   | 21   | 22   | 23   | 24   |
|-----------------|------|------|------|------|------|------|------|------|------|------|
| 1 AgMCO1        | 35.4 | 34.9 | 34.6 | 36.8 | 35.7 | 33.4 | 33.8 | 33.5 | 33.9 | 34.9 |
| 2 AaAAEL007802  | 35.7 | 35.8 | 35.5 | 35   | 37.7 | 35   | 34   | 34.6 | 35.9 | 35.5 |
| 3 AmLOC724890   | 35.2 | 33.1 | 34.7 | 35.5 | 32.9 | 34.8 | 32   | 34.5 | 32.7 | 34.5 |
| 4 BmMCO1        | 39.1 | 38.9 | 37.3 | 37.8 | 37.4 | 36.8 | 38.3 | 38.2 | 34.4 | 37.6 |
| 5 DmCG3759      | 37.3 | 33.9 | 33.4 | 34.6 | 34.2 | 35.2 | 33.4 | 34.3 | 34.6 | 36.1 |
| 6 MsLac1        | 38.8 | 39.4 | 37.8 | 38.6 | 37.8 | 37   | 37.1 | 38.1 | 34.9 | 37.6 |
| 7 TcLac1        | 37.4 | 37.3 | 37.5 | 36.9 | 38.1 | 37.6 | 36.2 | 35.3 | 36.4 | 37.1 |
| 8 AgMCO2A       | 42.5 | 40.5 | 41.6 | 41.1 | 41.5 | 42.6 | 43.4 | 48.1 | 33.5 | 33.6 |
| 9 AaLac1        | 42.7 | 41   | 41.3 | 40.9 | 41.9 | 42.8 | 43.3 | 47.7 | 33.2 | 33.4 |
| 10 AmLOC410365  | 40.9 | 40.8 | 41.4 | 39.3 | 40.9 | 42.1 | 43.3 | 50.6 | 31.7 | 33.9 |
| 11 BmLac2       | 42.8 | 40.8 | 40.4 | 39.5 | 41.4 | 42   | 43.8 | 48.1 | 33.7 | 32.9 |
| 12 DmCG30437-PA | 42.2 | 40.4 | 41.6 | 40.9 | 42.3 | 43.1 | 43   | 48.6 | 33   | 32.9 |
| 13 MsLac2       | 42.7 | 40.7 | 40.4 | 39.5 | 41.8 | 41.9 | 43.6 | 48.2 | 33.2 | 32.7 |
| 14 TcLac2A      | 42.4 | 40.7 | 41.2 | 41   | 40.6 | 41.3 | 42.8 | 48.9 | 32.3 | 32.7 |
| 15 AgMCO3       |      | 49.7 | 45.6 | 64.5 | 48.9 | 45.1 | 39.4 | 37.9 | 31.8 | 31.9 |
| 16 AgMCO4       | 65.6 |      | 60.5 | 46.6 | 70.9 | 56.1 | 36.2 | 36.1 | 32.6 | 33.2 |
| 17 AgMCO5       | 61.9 | 74.7 |      | 44   | 59.4 | 61.5 | 36   | 35.2 | 33   | 33   |
| 18 AaLac2       | 78.5 | 65   | 62.1 |      | 45.6 | 42.5 | 39   | 36.6 | 32.6 | 33.5 |
| 19 AaAAEL001632 | 67.2 | 84.3 | 75.4 | 65.9 |      | 57.3 | 35.5 | 35.7 | 33.3 | 33.8 |
| 20 AaAAEL001640 | 62.8 | 71.7 | 74.2 | 61.9 | 71.8 |      | 37.9 | 35.1 | 31.3 | 33.3 |
| 21 AmLOC552811  | 58.3 | 54.7 | 55.5 | 57.1 | 54.8 | 57.4 |      | 38.2 | 31.5 | 32.2 |
| 22 PhLac1       | 55.9 | 55.6 | 55.2 | 54.9 | 57.2 | 54.8 | 56   |      | 31.2 | 32.1 |
| 23 DmCG5959     | 50.8 | 50.4 | 50.1 | 53.3 | 52.1 | 50.8 | 52   | 51.4 |      | 40.3 |
| 24 DmCG32557    | 49.9 | 51.9 | 49.3 | 51.1 | 52.5 | 50.1 | 52.2 | 49.6 | 60.4 |      |

**Figure S1. Intron/exon structure of MCO genes.** Exons are represented by boxes that are drawn to scale, and their sizes (in bp) are indicated above the boxes. Introns are denoted by short lines, and their sizes (in bp) are indicated below the lines. Untranslated regions are shown in gray. The alternative exons of MCO2 are color coded to show analogous exons. The exons for MCO3, MCO4 and MCO5 are color coded to illustrate the relationship between the exons of these three genes. Note that the color code for MCO2 is different than the one for MCO3-5. MCO3 shares three intron positions with MCO4 and 5, and MCO4 and 5 share eight intron positions; MCO3, 4 and 5 share more intron locations with MCO2 than with MCO1 (see also Figure 1).

**Figure S2. Alignment of insect MCO sequences.** Sequences were aligned using the program ClustalW and adjusted by eye. The amino and carboxyl ends, which were highly variable, were left out of the phylogenetic analysis. Sequences blocked in grey were also omitted from the analysis because these regions aligned poorly due to high sequence variability. Numbers left and right of the alignment indicate amino acid position with respect to the start methionine. Asterisks (\*) below the alignment indicate identical residues at that position while colons (:) and periods (.) indicate strong and weak conservative substitutions. Accession numbers for the sequences are given in the Materials and Methods section of the main text. A gap in the AmLOC724890 sequence of approximately 70 amino acids after position 210 is likely an error in the gene prediction as this occurs in a region containing several conserved residues. The missing sequence is likely encoded by the partial gene prediction LOC727569 (GenBank accession no. XP\_001123278) which was not mapped to any linkage group; residues 7-100 and 171-208 of LOC727569 are a perfect match to residues 117-248 of LOC724890. However, inclusion or omission of the missing amino acids had no effect on the phylogenetic analysis, therefore, the LOC724890 sequence was used unaltered as deposited in GenBank.

**Figure S3. Alignment of MCO2 isoforms.** The carboxyl-terminal variable region of MCO2 proteins encoded by alternatively spliced exons was aligned using the program ClustalW and adjusted by eye. Numbers and symbols are the same as in Figure S2. Accession numbers for the sequences are given in the Materials and Methods section of the main text.

|              |     |                                                              |        |     |
|--------------|-----|--------------------------------------------------------------|--------|-----|
| AgMCO1       | 289 | CKRACTLGRKPETCYRFRLEWYRTLKSKACYNCPY-NA-----                  | TDCERP | 331 |
| AgMCO2A      | 151 | CARACREGEPPRICYHFTVEYYTVLGAACQVCTPNAT-----                   | NTVWSH | 194 |
| AgMCO3       | 50  | CLRECDNTQP-RICHSWTMEHYHVMGPACRDCAKGNH-----                   | TDCYHP | 92  |
| AgMCO4       | 71  | CDRICTEREAPRVCYFRWIAEHYAAMGSACGDCRWGNR-----                  | SHCFHP | 114 |
| AgMCO5       | 70  | CDRHCVPGDPPLTCHFWRKLENYATMGSACWDCRLGNR-----                  | AHCFHP | 113 |
| AaLac1       | 145 | CARACREGEPPRICYHFTAEEYTVLGAACQVCTPNAT-----                   | NTVWSH | 188 |
| AaLac2       | 61  | CMRSCEDTQP-RVCYFKWVLEHYHSMGPACKRCADGVH-----                  | SDCYLP | 103 |
| AaAAEL007802 | 241 | CRRECMRGRKPMNCYRFRKMEWYETLSKACYECPY-NV-----                  | TDCERP | 283 |
| AaAAEL001632 | 9   | CDRVCNATETPRICYFSWVAENYAAMGSACKDCRWGNH-----                  | TDCSRP | 52  |
| AaAAEL001640 | 66  | CDRTCSVDEPSRICYKWLLESYAAMGSACWDCIRGNR-----                   | THCFHP | 109 |
| AmLOC724890  | 47  | CRRNCVDEAPPMQCHYIFRLEAYHTMSKACYDCPF-NV-----                  | TDCFRK | 89  |
| AmLOC410365  | 133 | CARACRENEPPRICYHFTLEYYTVLGAACQICTPNAT-----                   | NVVWSD | 176 |
| AmLOC552811  | 36  | CVRNCTDNEQPKICYFFHIEFYTTVGPACDIQGSN-----                     |        | 71  |
| BmMCO1       | 137 | CERECKEGEDPMVCYHFNLEWYQTMKACFNCPF-NE-----                    | TDCFRP | 179 |
| BmLac2       | 157 | CARACRENEPPRICYHFTLEFYTVLGAACQVCTPNAT-----                   | NVVWSH | 200 |
| DmCG3759     | 245 | CNRDCQVGAEPMTCRYKFWVEWYQTFKSKACYDCPR-NL-----                 | TDCSRP | 287 |
| DmCG30437-PA | 180 | CARACREGEPPRICYHFTLEYYTVLGAACQVCTPNAT-----                   | NTVWSH | 223 |
| DmCG5959     | 102 | CRRVCQQGQS-QNCYQLVHVNYQRLGPECQRCQF-DE-----                   | RACASE | 143 |
| DmCG32557    | 67  | CRRDCADKQP-MTCYMYMVVHYDDTMAETCKRYLQSKFRFKLSGKEYIDGIALATQLAAN |        | 125 |
| MsLac1       | 148 | CERECKEGEEPVCYHFNLEWYQTMKACYNCPF-NE-----                     | TDCSRP | 190 |
| MsLac2       | 153 | CARACRENEPPRICYHFTLELYTVMGAACQVCAPNAT-----                   | NVVWSH | 196 |
| PhLac1       | 51  | CARACIDGEPKTCYHFTVEYYSTLTEACKLCCQEAR-----                    | SRVTPD | 94  |
| TcLac1       | 44  | CARKCVKDSVPMTCRYTFLLEWYHTLSKACYDCPY-NT-----                  | QDCYRE | 86  |
| TcLac2A      | 108 | CARACREGEPPRICYHFTLELYTVLGAACQVCTPNAT-----                   | NTVWSH | 151 |
| SpLOC586543  | 54  | WFRDCT-GSAPMSCEYTFVVEWYVTMAKACYDCPC-NL-----                  | SDCERV | 95  |

\* \* \* : . \*

|              |     |                                                                |  |     |
|--------------|-----|----------------------------------------------------------------|--|-----|
| AgMCO1       | 332 | -HCITGDGVERR-NVAVINRMMPGPAIEVCENDIIVVDVENHLM-GESTTIHWHGLHQRR   |  | 388 |
| AgMCO2A      | 195 | CQCVLADGVER-GILTVNRMIPGPSIQVCENDRVVIDVENHME-GMELTIHWHGIWQRGT   |  | 252 |
| AgMCO3       | 93  | -ACITADGVER-GVMSLNRKIPGPTISVCRHDLIVVDITNAMA-GTSAAIHWHGLHQRRAT  |  | 149 |
| AgMCO4       | 115 | -QCITADGMER-GVLALNRRIPGPTIHVCRHDLIVVDVNNHME-GLESTIHWGHGAHQYDT  |  | 171 |
| AgMCO5       | 114 | -QCITANGLER-GVFAINRRVPGPIHVCKHDSIVVDVENQLE-GLGSTIHWGHGFHQKAT   |  | 170 |
| AaLac1       | 189 | CQCVLADGVER-GILTINRMIPGPSIQVCENDRVVIDVENHME-GMELTIHWHGIWQRGT   |  | 246 |
| AaLac2       | 104 | -ACLTADGFER-GVMSINRQVPGPAIQVCKDDLIIVVDMTNAMG-GTATAMHWHGLHQRRDT |  | 160 |
| AaAAEL007802 | 284 | -HCIAADGVS-RSVIVINRMMPGPSIEVCENDIITVDVENHLM-GDSTTIHWHGLHQKRT   |  | 340 |
| AaAAEL001632 | 53  | -QCITADGMER-PVSLNRQMPGPAIVCRNDIIVIDLLNHME-GSSTTIHWGHMHTQT      |  | 109 |
| AaAAEL001640 | 110 | -QCVTANGMER-SIVSINRKMPPGLIFVCQGDITVVDVSNEME-GMSATIHWHGFQRMQS   |  | 166 |
| AmLOC724890  | 90  | -HCIPADGIER-SILVNRQMPGPAIEVCQGDRIITVDVINLLH-SESTTMHWHGQHHVKT   |  | 146 |
| AmLOC410365  | 177 | CQCVLADGVER-GILTANRMIPGPSIQVCQGDVVVIDVENHIE-GMEVTIHWGHVWQRGS   |  | 234 |
| AmLOC552811  | 72  | -QCILADGIEK-TLIPINRQLPGPIEVCLNDRVVVDVQNAAM-GMEATIHWHGLFQNGF    |  | 128 |
| BmMCO1       | 180 | -DCIPADGMNR-PLNVINRKMPPGPAIEVCQHDRVIDVENDLM-TEGTTVHWHGQHQRGT   |  | 236 |
| BmLac2       | 201 | CQCVLADGVER-GILTANRMIPGPSIQVCENDKVVVIDVENHME-GMEVTIHWGHVWQRGS  |  | 258 |
| DmCG3759     | 288 | -HCVMGDGLER-SITVNRMMPGPAIEVCEGDEIVVDVKNHLL-GESTSIHWHGLHQKKT    |  | 344 |
| DmCG30437-PA | 224 | CQCVLADGVER-GILTANRMIPGPSIQVCENDKVVVIDVENHME-GMEVTIHWGHVWQRGS  |  | 281 |
| DmCG5959     | 144 | -HCIYGDGVAN-PVMAVNRMVPGPSIELCENDTVVVDVNLNLS--EPTTMHWHGVHMHRT   |  | 199 |
| DmCG32557    | 126 | DDCKYADGLES-EVMVNGQLPGMNI EVCYGDVVADVINSMH--ETTTIHWGHMHRQLT    |  | 182 |
| MsLac1       | 191 | -DCIPADGMNR-ALSVVNRKMPPGPAIEVCQDDRIIVDVENHME-GMEVTIHWGHVWQRGT  |  | 247 |
| MsLac2       | 197 | CQCVLADGVER-GILTANRMIPGPSIQACENDKVVVIDVENHME-GMEVTIHWGHVWQRGS  |  | 254 |
| PhLac1       | 95  | CQCIQADGYEKSGLITVNRMYPGPGIMACLDGNDIIVDVENRVL-GNAVTVHFGVYQRNY   |  | 153 |
| TcLac1       | 87  | -DCIPGDGNKR-SIIVNRKMPPGPSVEVCLGDEVIDVNNHLS-SDSTTIHWGHGHQKNS    |  | 143 |
| TcLac2A      | 152 | CQCVLADGVER-GILTANRMIPGPSIQVCEGDKVVVIDVENHIE-GNEVTLHWGHVWQRGS  |  | 209 |
| SpLOC586543  | 96  | -HCVPADGVPR-QIMVANRALPGPAIEVCEGDEIVNVAVNSMDNGESITLHWGHVYQTSN   |  | 153 |

\* .:\* : \* \*\* : \* \* : : \* : : : \*

|              |     |                                                                |     |
|--------------|-----|----------------------------------------------------------------|-----|
| AgMCO1       | 389 | PYMDGVPVHSQCPI SPGTTFRYTFRADNPGTHFWHSHTGMQRGDGAFGALIIR--KDNDI  | 446 |
| AgMCO2A      | 253 | QYYDGVPFVVTQCPIQQGNTFRYQWTG-NAGTHFWHAHTGLQKLDGLYGSIVVRQPPSRDP  | 311 |
| AgMCO3       | 150 | PYMDGVPFITQCPIGFGNTFRYAFLATEPGTQFYHSHSGHHKVNGHYGALIVREPKRVDP   | 209 |
| AgMCO4       | 172 | PWMDGVPMITQCPIPNGAAFRYAFNASEPGTQLYHSHSGHQKANGHYGLFVIRSP--TDI   | 229 |
| AgMCO5       | 171 | PWMDGVPVMTQCPIPQDTTFRYQFTAVEAGTQFYHSHAGFQKANGHYGMVVVRDP--SDL   | 228 |
| AaLac1       | 247 | QYFDGVPFVVTQCPIQQGNTFRYQWTG-NAGTHFWHAHTGLQKLDGLYGSIVVRQPPSRDP  | 305 |
| AaLac2       | 161 | PHMDGVPFVVTQCPIEFMSTFRYAFWATEPGTQFYHSHAGHHKVNGHYGAMIIRQPEVNDP  | 220 |
| AaAAEL007802 | 341 | PYMDGVPHISQCPI SPGTTFRYTFKADNAGTHFWHSHTGMQRGDGAFGLIIR--RDNDP   | 398 |
| AaAAEL001632 | 110 | PWMDGVPVMTQCPIPAGNTFRYVFNASEHGTQFYHSHAGHQKANGHFGLLVVRHP--TDL   | 167 |
| AaAAEL001640 | 167 | PWMDGVPVMTQCPIAPSTTFRYRFVAEEAGTHWYHSHSGYHMANGLGAAVVRNP--LDV    | 224 |
| AmLOC724890  | 147 | PYMDGVPYVSQCPIILPGSTFRYDFIATEAGTHFWHSHTGMQRGDGQVGFPLIVRTPPKANW | 206 |
| AmLOC410365  | 235 | QYYDGVPFVVTQCPIQEGSTFRYQWTAGNEGTHFWHAHTGLQKMDGLYGSIVIRQPPSKDP  | 294 |
| AmLOC552811  | 129 | QYYDGVPFVVTQCPIASSSTFRYDFVVKNSGTHFYHSHISTHMLDGQIGSFIVKDPKRNK   | 188 |
| BmMCO1       | 237 | PYMDGTPYVVTQCPIPETTFRYQFNATHTGTHFWHSHTGMQRADGAAGAFIVRKPQSDP    | 296 |
| BmLac2       | 259 | QYYDGVPFVVTQCPIQQGNTFRYQWQG-NAGTHFWHAHTGLQKLDGLYGSIVVRQPPSKDP  | 317 |
| DmCG3759     | 345 | PYMDGVPHITQCPI TPATFRYSFADLSGTHFWHSHTGMQRGDGQVGFALIIRKPKTAEP   | 404 |
| DmCG30437-PA | 282 | QYYDGVPFVVTQCPIQQGNTFRYQWTG-NAGTHFWHAHTGLQKLDGLYGSVVVRQPPSRDP  | 340 |
| DmCG5959     | 200 | PEMDGAPFITQYPLQFGEVQRHEFKVDRSGSLWYHSHVWGVRGFGVAGAFVVRQTSQENQ   | 259 |
| DmCG32557    | 183 | PFMDGVPHVTQYPIEAGQAFRYRFEVDHGHTNWWHSHTEHQRAFLAGPLVVRMPPKLNK    | 242 |
| MsLac1       | 248 | PYMDGTPYVVTQCPIPETTFRYQFTARHSGTHFWHSHTGMQRADGAAGAFIIRKPKSQEP   | 307 |
| MsLac2       | 255 | QYYDGVPFVVTQCPIQQGNTFRYQWQG-NAGTHFWHAHTGLQKLDGLYGSIVVRQPPSKDP  | 313 |
| PhLac1       | 154 | QYSDGVPFVVTQCPIQEGSTFRYQWKAENSGTHLWHAHTGLHKGEGLMGPLIIRPKSTEP   | 213 |
| TcLac1       | 144 | PYMDGVPFVVTQCPIHFGMTFRYHFNVHNSGTHFWHSHTGMQRSDGTFGPFIVRVEEDNP   | 203 |
| TcLac2A      | 210 | QYYDGVPFVVTQCPIQQGNTFRYQWIIAGNAGTHFWHAHTGLQKMDGLYGSVVIRQPPAKDP | 269 |
| SpLOC586543  | 154 | QYMDGVFMVTQCPIILPRTTFRYFNFSADHAGTHFWHAHTGMHRADGLFGAMIIRQSKQVDA | 213 |

\* . : : \* \* : . \* : : \* : : \* \* : : : \*

|              |     |                                                                |     |
|--------------|-----|----------------------------------------------------------------|-----|
| AgMCO1       | 447 | QELLYDHDLSEHVITVQDWGHEQGVSLFASHHSTG-DNKPPNLLINGRKGKQYRFAKTT    | 505 |
| AgMCO2A      | 312 | NSHLYDFDLTTHIMLVSDWLHEDAERYPGRLAVNT-GQDPESLLINGKQFRDPNTGFM     | 370 |
| AgMCO3       | 210 | NGDLYHYDTPAHVILGSDWMHIDGEMFMPG--LPSAGGIMPINLLINGKGTYHD-PKKNE   | 266 |
| AgMCO4       | 230 | NRHLYDYDLSEHIIISDWTLDLVEKFVPG--LQS-STVRMDSILINGRGRHFDEEHEL     | 286 |
| AgMCO5       | 229 | NQAHYDYDLSEHRIIADWTLDMVEKWVPG--IQT-DSMRVDSILINGRGRYFNETTGTR    | 285 |
| AaLac1       | 306 | NSHLYDFDLTTHIMLVSDWLHEDAERYPGRLAVNT-GQDPESLLINGKQFRDPNTGFM     | 364 |
| AaLac2       | 221 | NAKLYDFDLPEHLIVASDWMHVDGEMMPG--LPNGDGIIPVNLINGRGTWLK-HNGN-     | 276 |
| AaAAEL007802 | 399 | QQILYDHDLSEHVITVQDWGHVAGNQMFTAHHHSTG-DNKPPNLLINGRKGKQYRYPKIS   | 457 |
| AaAAEL001632 | 168 | NMNLDYDYDLSEHIIADWTLDMAEKVPG--LQS-HTIQMDSILINGRGRHFDEEQEL      | 224 |
| AaAAEL001640 | 225 | NMALYDFDLSEHVMLISDWTLDLSDAERWVPG--QQS-SQMAVDSILINGRGRYTKKETGTK | 281 |
| AmLOC724890  | 207 | HKDL-----                                                      | 210 |
| AmLOC410365  | 295 | NSNLYDYDLTTHVVLISDWFHENAERFPGR LAVNT-GQAPESVLLINGKQFRDPNTGFM   | 353 |
| AmLOC552811  | 189 | HRDLYDKDE--IVIFLSDWIHELSEFRYPGYRYNVLGQTAENILINGLGNYTAN-GNT     | 245 |
| BmMCO1       | 297 | HGHLDYDRDTHVMIVTDWIHELSEVGMFTDHHHSSG-DNKPPNLLINGVGR-FRVFNNDT   | 354 |
| BmLac2       | 318 | NSHLYDYDLTTHVMLISDWLHEDAERYPGRLAVNT-GQDPESVLLINGKQFRDPNTGFM    | 376 |
| DmCG3759     | 405 | HGGLYDFDLSEHVMIQDWIHDGASIFSYHHHSRG-DNKPHNLLVNGKGRYRNRIWAEA     | 463 |
| DmCG30437-PA | 341 | NSHLYDFDLTTHIMLVSDWLHEDAERYPGRLAVNT-GQDPESVLLINGKQFRDPNTGFM    | 399 |
| DmCG5959     | 260 | HSQLYDYDLVEHTLMIQDIFYEYNLQDVRN-----ILVNGKGRNHLSQLPDN           | 306 |
| DmCG32557    | 243 | HAHLYDFDMSEHVIMIQDWHNFVESAEN-----ILINGRGRN-LKKGVKA             | 288 |
| MsLac1       | 308 | YESLYDYDRSDHVMIVTDWIHQ LAVGMFTDHHHSSG-DNKPPNLLINGVGR-FKIFNNDT  | 365 |
| MsLac2       | 314 | NSHLYDYDLTTHVMLISDWLHDDAERYPGRLAVNT-GQDPESVLLINGKQFRDPNTGFM    | 372 |
| PhLac1       | 214 | NHDLWDHDDIDNVIPLSDWFHRSSADHFPGNFHREP-GQEPDNFLINGMGQWTDPTGET    | 272 |
| TcLac1       | 204 | HAKLYDYDLSSHVITILDWTKEGDTDKFMSHIHNDG-DNKPDTILVNGFGR-FKHVFGAD   | 261 |
| TcLac2A      | 270 | NSHLYDYDLTTHVMLISDWMHEDATERFPGR LAVNT-GQDPESVLLINGKQFRDPNTGFM  | 328 |
| SpLOC586543  | 214 | QGLLYDYDLPEHKVVLIDWTHQGHVSIYLDQHFRGT-EDDPKSI LINGKGA-FAVYGNDA  | 271 |

: . \* : \* : . \* : \* \*

|              |     |                                                            |     |
|--------------|-----|------------------------------------------------------------|-----|
| AgMCO1       | 506 | PLTTTTTSTEEPALPETIMAVEPESTTLMEELPTTTPITDAITPDDTELLQASSNTNL | 565 |
| AgMCO2A      | 371 | TN-----                                                    | 372 |
| AgMCO3       | 267 | TTQ-----                                                   | 269 |
| AgMCO4       | 287 | QTQ-----                                                   | 289 |
| AgMCO5       | 286 | AD-----                                                    | 287 |
| AaLac1       | 365 | TN-----                                                    | 366 |
| AaLac2       | 277 | RTN-----                                                   | 279 |
| AaAAEL007802 | 458 | TISVNRD-----TANDAELIQSSPSKGL                               | 480 |
| AaAAEL001632 | 225 | QQ-----                                                    | 226 |
| AaAAEL001640 | 282 | VDY-----                                                   | 284 |
| AmLOC724890  | 210 | -----                                                      | 210 |
| AmLOC410365  | 354 | TN-----                                                    | 355 |
| AmLOC552811  | 246 | TN-----                                                    | 247 |
| BmMCO1       | 355 | EKP-----                                                   | 357 |
| BmLac2       | 377 | TN-----                                                    | 378 |
| DmCG3759     | 464 | KQAHRAEER-----TTQPVEPLPKSQVDFVQ                            | 490 |
| DmCG30437-PA | 400 | TN-----                                                    | 401 |
| DmCG5959     | 307 | DNR-----                                                   | 309 |
| DmCG32557    | 289 | AKP-----                                                   | 291 |
| MsLac1       | 366 | EKP-----                                                   | 368 |
| MsLac2       | 373 | TN-----                                                    | 374 |
| PhLac1       | 273 | TN-----                                                    | 274 |
| TcLac1       | 262 | NST-----                                                   | 264 |
| TcLac2A      | 329 | TN-----                                                    | 330 |
| SpLOC586543  | 272 | STS-----                                                   | 274 |

|              |     |                                    |     |
|--------------|-----|------------------------------------|-----|
| AgMCO1       | 566 | KTVLRAEEVR---HRTKRQSRVNFNAIVVPESKH | 622 |
| AgMCO2A      | 373 | -----TPLEIFTITPGRRYRFRMINAFASV     | 397 |
| AgMCO3       | 270 | -----TPLEVYTVRRGARFRFRFINAASHV     | 294 |
| AgMCO4       | 290 | -----APLTVYRVKKGYRYRFRLVSSGSQF     | 314 |
| AgMCO5       | 288 | -----APLTVYQVEYGGRYRFRLVSSGSQY     | 312 |
| AaLac1       | 367 | -----TPLEIFTITPGRRYRFRMINAFASV     | 391 |
| AaLac2       | 280 | -----APREVYRVKGGRYRFRFINAASHV      | 304 |
| AaAAEL007802 | 481 | KQVTATNLSMRPLARMKRQSRVNFNAVVPESKH  | 540 |
| AaAAEL001632 | 227 | -----SPLTVYRVEQWKRYRFRMISGSQF      | 251 |
| AaAAEL001640 | 285 | -----TPLTVFRVRRNYRFRLVSSGSQY       | 309 |
| AmLOC724890  | 211 | -----YRFRLVNAEFLN                  | 222 |
| AmLOC410365  | 356 | -----TPLEVFTITPGRRYRFRLVNSFGSV     | 380 |
| AmLOC552811  | 248 | -----GSLKVFVTKGERHRIRMINSFSTV      | 272 |
| BmMCO1       | 358 | -----LYMKAARFNVEQGHRYRFRVINAFLN    | 384 |
| BmLac2       | 379 | -----TPLEVFTITPGRRYRFRMINAFASV     | 403 |
| DmCG3759     | 491 | TLPRQARLAKTNTTKLFPVNSRQKRGNLNEIPL  | 550 |
| DmCG30437-PA | 402 | -----TPLEIFTITPGRRYRFRMINAFASV     | 426 |
| DmCG5959     | 310 | -----HRYERLRVTPGYRMRVILNGIAN       | 334 |
| DmCG32557    | 292 | -----TLYAHFPVVRGGRYRFRVIFNGVSN     | 316 |
| MsLac1       | 369 | -----VYMKAARFNVEQGYRYRFRVINAFLN    | 395 |
| MsLac2       | 375 | -----TPLETFTITAGRRYRFRMINAFASV     | 399 |
| PhLac1       | 275 | -----TSYAHFNVTNGKSYKFRLVINGAGMT    | 299 |
| TcLac1       | 265 | -----VFVPTARFTVEQGYRYRFRVINAFLN    | 291 |
| TcLac2A      | 331 | -----TPLEVFTITPGRRYRFRMINSFASV     | 355 |
| SpLOC586543  | 275 | -----TVTPREIYNVTQKRYRFRVISAIAIN    | 301 |

: .:\*.:

|              |     |                                                                  |     |
|--------------|-----|------------------------------------------------------------------|-----|
| AgMCO1       | 623 | CPVELSIENHNLTVIASDGGFIQPLEDLGSFVSYAGERFDFIVKANQPIGNYLIRFRGLM     | 682 |
| AgMCO2A      | 398 | CPAQVTIEGHALTVIATDGEVPVHP-AQVNTIIISFSGERYDFVITADQPVGAYWIQLRGLG   | 456 |
| AgMCO3       | 295 | CPLQLQIEDHMMEVIASDSFHLQP-RKVDTLVSTSGERYDFVLEANGVKDITYWVRLRSLG    | 353 |
| AgMCO4       | 315 | CPFQLQIEKHRMQLIVTDGGAVQP-TMVDTLISTSGERYDFVLSANQKPGTYWVRVRAIG     | 373 |
| AgMCO5       | 313 | CPFQMQIQNHSMIIISTDGGTVQPQHTVDTLVISISGERYDFVLTANQPPGNYWVRVRGIG    | 372 |
| AaLac1       | 392 | CPAQVTIEGHGLTVIATDGEVPVLP-VQVNTIIISFSGERYDFVLSADQQVAYWIQLRGLG    | 450 |
| AaLac2       | 305 | CPLELQIANHTLEIIASDSYNLQP-ISANTLVTTSGERYDFVFNADQPTDDYWIRLRAIG     | 363 |
| AaAAEL007802 | 541 | CPVELSVEGHNLTVISSDSFDINVEDLASIVSYAGERFDFILRANQPVGNLMRFRGLM       | 600 |
| AaAAEL001632 | 252 | CPFQLQIEAHRMQIIISTDGGAVQP-VTVDTVISTSGERYDFVLHADQKPGDYWVRVAVG     | 310 |
| AaAAEL001640 | 310 | CPFQLQIENHRMLVISTDGGAVKP-HMVDTLISISGERYDFVINADQPVGNWVRVRGAG      | 368 |
| AmLOC724890  | 223 | CPIEISIDNHTMRVISSDGRDIEAVE-AESLVS YAGERFDFV VETSQNIDNFWIRFRGLM   | 281 |
| AmLOC410365  | 381 | CPSQITFEHSLTIIATDGEAVQP-VTVDTIIISFSGERYDFVINADQPVGNWVIRVSLG      | 439 |
| AmLOC552811  | 273 | CLTELRIEKHKLIIIAQDGENVKP-KPVDKIVTSTGERVDFILVANQSVDSYWIQARGLG     | 331 |
| BmMCO1       | 385 | CPIELSV DGHNITVISSDGYDLEPIA-ATSLV TYAGERYDFIL DANNEIDNYWIRFRGLM  | 443 |
| BmLac2       | 404 | CPAQITFEHNLTVIATDGEVPVQP-VQVNTIIISFSGERYDFVIEANNIPGAYWIQVRGLG    | 462 |
| DmCG3759     | 551 | CPIVVSIDGHNLTAINS DGFDI EAMD-VGSIVTYSGERFDFVLNANLEVGNYWIRLKGML   | 609 |
| DmCG30437-PA | 427 | CPAQVTIEGHGTMV IATDGEVPVHP-VDVNTIIISFSGERYDFV ISADQPVGAYWIQLRGLG | 485 |
| DmCG5959     | 335 | CPVEFSIEQHRLLMISTDGN D IEP-VLADGFFL TSAERFDFV LEANQYKKNYWIRIKGYE | 393 |
| DmCG32557    | 317 | CPISFSIDKHDLVVIASDGN D IEP-VEVQRIMFHGAERFDFVLHANQEVSNYWIRVKGYS   | 375 |
| MsLac1       | 396 | CPIEMSV DGHNITVIASDGYDLEPI T-ATSLV TYAGERYDFIL DANNEIDNYWIRFRGLM | 454 |
| MsLac2       | 400 | CPAQVTFEGHNLTVIATDGEVPVQP-VQVNTIIISFSGERYDFVIEANNIPGAYWIQVRGLG   | 458 |
| PhLac1       | 300 | CPLMLTIEGHKMHIIASD GQPLEL-VTVNTIT SFAAERYDFVLNANKPIGNYWIQLRADG   | 358 |
| TcLac1       | 292 | CPIEVSIDNHTLSVISTD GSDFNATE-VDSLVTYAGERFDFIVTADQPQDVYWMHFRGLM    | 350 |
| TcLac2A      | 356 | CPAQLTIQGHDLT L IATDGEVPVHP-VRVNTIIISFSGERYDFVINADQTPGAYWIQLRGLG | 414 |
| SpLOC586543  | 302 | VPMKVSVDGHNITL ISSDGD D FEPL E-VDAFFLYGGERYDFILNASQEVGNLVKVEGSK  | 360 |

. . \* : \* \* . . . . . \*\* \* : : . : : . .

|              |     |                                                                |     |
|--------------|-----|----------------------------------------------------------------|-----|
| AgMCO1       | 683 | DCDERFTSAYQFAVLRYRGAPT-----DTEYESWPPYD---YEAPGVQLNS            | 725 |
| AgMCO2A      | 457 | ECG--IKRAQQLAILRYARGP-----YQPASPPPTYD---VGLPQGVVMNP            | 497 |
| AgMCO3       | 354 | PCA--DLQLEQFAVLRYTTGP--FIN-----DAFPTGAPPTYEEP---FRNVATANH      | 398 |
| AgMCO4       | 374 | FCN--IERREEFAVLSYEDEAHVPE-----EVLAYPKRTPPSWDDR---FPSGTVLNN     | 422 |
| AgMCO5       | 373 | FCD--QMRVEDFAILSYRTPETAIPAAGLTVEQTLAYPTEPMPPTYDEP---YPDGI VFNH | 427 |
| AaLac1       | 451 | ECG--IKRAQQLAILRYARGP-----YQPASPPPTYD---VGLPQGVVLNP            | 491 |
| AaLac2       | 364 | PCD--YRQISQVAVLSYQPM SVPEED-----IAFTDKEIPHYQDQL--FLNDVYVNH     | 411 |
| AaAAEL007802 | 601 | DCDERFTSAYQVAVLRYK GAP-----EVEYEQWPNYD---FPLEGMQLNS            | 642 |
| AaAAEL001632 | 311 | FCN--IQRKEEFAVLSYRSSE- ISD-----EELAFPVQVPPTWDEP---FPDGMTLNH    | 358 |
| AaAAEL001640 | 369 | FCS--TL SVETFAILSYADPSIST-----ESLMYPTLEPPEYGNA---YPMGQTLNE     | 415 |
| AmLOC724890  | 282 | DCDERFTKAYQVAILRYEGAT-----NKDPNGLVGYEYKSNYSTDGQRINA            | 327 |
| AmLOC410365  | 440 | ECG--IPRAQQLGILRYARGP-----YQPTTTAPT YD---FGLPQGVVLNP           | 480 |
| AmLOC552811  | 332 | ECA--TTFMQQLAILKYENGP-----FRPSTPLPNYN---DTIDGVIYNG             | 371 |
| BmMCO1       | 444 | DCDEVFTKAKQVGLHYEGAM-----EVEPAGDPTWE---ELHNEGLQLNA             | 486 |
| BmLac2       | 463 | ECG--IKRAQQLGILRYARGP-----YQPSSLAPT YD---VGIPQGVVMNP           | 503 |
| DmCG3759     | 610 | DCSEVFTSAFQVAILRYEGAP-----DEEPTAELSYG---HKAEGIELNV             | 651 |
| DmCG30437-PA | 486 | ECG--IRRAQQLAILRYARGP-----YQPASSPPTYD---VGIPQGVVMNP            | 526 |
| DmCG5959     | 394 | QCE--NRNIYQGA VLSYRGSARS-----ELPQGDILDKPSSRAADEDLILVND         | 439 |
| DmCG32557    | 376 | FCA--KNQLHQEAVLHYRDADTR-----ALDT-----HTLSYAYDAPGKTLNE          | 416 |
| MsLac1       | 455 | DCDEIYTRAKQVAVLHYEGAM-----DLEPPGDPSWF---ELHNEGLQLNA            | 497 |
| MsLac2       | 459 | ECG--IKRAQQLGILRYARGP-----YQP SLPAPT YD---IGIPQGVVMNP          | 499 |
| PhLac1       | 359 | PCI--NRKMQQFAVLHYTSAP-----VEPQRSRITFDGP-TSLDTGVILNP            | 401 |
| TcLac1       | 351 | DCDERFTRAYQVAVLEYKGTQ-----TNYPSYEPTYD---NSRREGKQLNP            | 393 |
| TcLac2A      | 415 | ECG--IRR VQQLGILRYAKGP-----YQPSQAPPTYD---YGIPQGVVLNP           | 455 |
| SpLOC586543  | 361 | QSGSLVG---LAVIRYQGA-----DEVPPADPSVD-----RQGLVYQD               | 396 |

. : : \* :

|              |     |                                                               |     |
|--------------|-----|---------------------------------------------------------------|-----|
| AgMCO1       | 726 | LN--RGPGA--ENV-ITIAETSAL-----DQEDLLLLRNEDYKFVYVDFYKDNPH-      | 773 |
| AgMCO2A      | 498 | LD-AQCNVQ--RDDAICVSQLKNAKE-----IDRALLQDKPDVKIFLPPFRFYLYRPEE-  | 547 |
| AgMCO3       | 399 | PN-ATCGRP--EFGDYCITDFQAYDT-----DEDVINGVPDHQLTFGFYNYPVSFES-    | 447 |
| AgMCO4       | 423 | PN-ATCYVP--GDDDLCVADLESHEVH-----RDDDLIDAAPNKTRILFNFTTADPAV-   | 473 |
| AgMCO5       | 428 | QT-APCYTP--NDTYICAADLEAYEVF-----RDTGLIDAVPDRTFFLGFHVI EANNSL- | 478 |
| AaLac1       | 492 | LD-AQCNVQ--RDDAICVSQLKNAKD-----IDRALLQEKPDVKIFLPPFRFYLYRPEE-  | 541 |
| AaLac2       | 412 | PN-TTCGVS--KP-DVCITDFQAYET-----DDDVINGVPDMQFILGFENYPMK FED-   | 459 |
| AaAAEL007802 | 643 | LN--KGTGH--SDT-MSIAETSSR-----DQEDLLLLREKTDKFKFYVYDFYAKDNPH-   | 690 |
| AaAAEL001632 | 359 | PN-STCYQP--GDQFVCASDLEAHEVQ-----RDDALIDAVPDKKIFYAVANTFTADTSL- | 409 |
| AaAAEL001640 | 416 | QT-ATCYNS--EDQFTCAADLETHEAH-----RDDKLINATPDVRLFLGFKMMHPDNRW-  | 466 |
| AmLOC724890  | 328 | LN--EGTET--NNS-ISIPLLKAM-----DKNDKSN-TADPDYQFVYSYDFYKKNPNH-   | 374 |
| AmLOC410365  | 481 | LD-AICNRQ--REDAICVSQLKNAKQ-----IDQGILQQRPDVKIFLPPFRFLFYRPEE-  | 530 |
| AmLOC552811  | 372 | LNGTLCNTN-ITEPVLCINQLESLES-----EN-DLLKVEPDERHILPFWFFNYTDTSK   | 423 |
| BmMCO1       | 487 | LN--KGEEE--DET-ISVAEMKSL-----DGYDESL-KEIADYQFYVAYDFYAKNNSH-   | 533 |
| BmLac2       | 504 | LD-ARCNIS--RNDAICVSQLKNAQN-----IDPAILQERPDKIFLPPFRFFVYRPEM-   | 553 |
| DmCG3759     | 652 | MN--RGPGY--PDT-KTVAEMRALPIYDHVSGIDHDTLKP EADYKFFIYYDFYTKNNDP- | 705 |
| DmCG30437-PA | 527 | LD-AQCNRQ--RNDAICVSQLKNALE-----IDRGILAEKPDVKIFLPPFRFFVYRAED-  | 576 |
| DmCG5959     | 440 | FR-----FKPANSTAISSL-----RQSLDKDNNVGTVALRSVDPVPWTRYTK-         | 481 |
| DmCG32557    | 417 | LG-----DDASGARAG-----NSISLANLNAQRPEPEVAPS--                   | 447 |
| MsLac1       | 498 | LN--KGEEE--NET-ISVAEMRSL-----AGYDDSL-KEIADYQFYIAYDFYAKNNSH-   | 544 |
| MsLac2       | 500 | LD-ARCNIL--RNDAICVSQLKNAKH-----IDPAILQERPDIKIFLPPFRFFVYGPET-  | 549 |
| PhLac1       | 402 | LN-VRCFEQKLRTYIRCMSDLVNAKP-----IPQEILKDKADVQIFMNFNGFYNDPND-   | 453 |
| TcLac1       | 394 | LN--KGTEA--DSSFVTLPLHSL-----DEWDDTL-KEKADFQYVYSYDFYKMNHPV-    | 441 |
| TcLac2A      | 456 | LD-ARCNEI--RPDAICVSQLKNALS-----IDKGILREKPDVKIFLPPFRFH IYTPED- | 505 |
| SpLOC586543  | 397 | VD--QEPNV--FPS---VNDLRSLG-----TSKLNNTPT-                      | 422 |

|              |     |                                                                |     |
|--------------|-----|----------------------------------------------------------------|-----|
| AgMCO1       | 774 | ---FHVPSLYGFQQVVMNTNRLYTPQLNHISMRMPVPFPLPGKDV LDE--SQFCNETSVR  | 828 |
| AgMCO2A      | 548 | --LFQPNTYNRFLVAPTGDHVISL--IDEISYLSAPAPLLSQYDDINP--EQFCNGDNRP   | 601 |
| AgMCO3       | 448 | --MFEENRYEHYMN IYGSVMQGA--INNISLAYPPFSLLTQPEKIR--DDTFCEEDNRP   | 501 |
| AgMCO4       | 474 | --LFSHQGYVRYMTVVLTLNNIGV--TNNISMVFPDFPLLTQPELIG-GDGMFCNNTHRP   | 528 |
| AgMCO5       | 479 | --LFSDRGTSHYATVREGFNTIGA--TNMISFVPPSFP LLIQPELIVDENAQFCNVSHRP  | 534 |
| AaLac1       | 542 | --LFQPNTYNRFLVAPTGDHVISL--IDEISYLSAPAPLLSQYDDINP--EQFCNGDNRP   | 595 |
| AaLac2       | 460 | --AFGMSHEHFMMNIHDDIVLQGA--INNISFTYPPFSLLTQTDLIT--EGMFCDEDSWP   | 513 |
| AaAAEL007802 | 691 | ---FHVPDLYGFKDVINNTNRLFTPQLNHISMRMPKIPMMPGKDELDE--SLFCNASSLM   | 745 |
| AaAAEL001632 | 410 | --LFSNDGYVRYMTVALTLNNIGI--TNNISMVYPSFPPLTQPELPTMENAF CNVSSRP   | 465 |
| AaAAEL001640 | 467 | --LFSEYKP--FITVREDFNTIAA--ANNISFRYPSFP LLIQPDLI IDENKQFCNSTHLP | 520 |
| AmLOC724890  | 375 | ---FHRGKLYGFNQVKN-TKQVLT PQLNHISMKLPMPPLLSQRDFIDS--DQFCNSSTVQ  | 428 |
| AmLOC410365  | 531 | --VFQPQTYNRFLVAPTGDHVISL--VDEISFTFPAPPLSQIDDI PP--EQFCNGDNRP   | 584 |
| AmLOC552811  | 424 | NRLFNSSSYL PFFNANDRSQLLSI--FNDAIYENPASNLLTQSSSYR---AICK-KNQL   | 476 |
| BmMCO1       | 534 | ---FHRSPYYGYYQVPEKVNRLYTPQLNHISMKMPSSPLLVAR--PTP--DHFCNASSIE   | 586 |
| BmLac2       | 554 | --LFQPNTYNRYLVAPGGDHVISL--IDEISYMSPPAPPLISQYDDINP--DQFCNGDNRP  | 607 |
| DmCG3759     | 706 | ---FHDKDLYAMD MEMTQQNRLYTPQLNHITLNFPSLALLPSRSQ LKD--SDFCNETSLM | 760 |
| DmCG30437-PA | 577 | --LFQPNTYNRFLVAPTGDHVISL--IDEISYLSAPAPLTSQYNDINP--DQFCNGDNRP   | 630 |
| DmCG5959     | 482 | ---FLTHYSSFGSRTAPNGE-VLFQISDISYNSPGISLLQGRHLYQDD-RYFCNKSSLA    | 535 |
| DmCG32557    | 448 | ----VTFYTSMNAFEVRQEGEGRFQMDDISFSMPKMSLLQTRNLGVG--QFFCNRSQQA    | 500 |
| MsLac1       | 545 | ---FHRSPYYGYYQVPEQVNRLYTPQLNHISMKMP TSP LLITR--PSP--ENFCNASSID | 597 |
| MsLac2       | 550 | --LFQPNTYNRYLVAPSGDHVISL--IDEISYMSPPAPPLLSQYDDINP--EQFCNGDNRP  | 603 |
| PhLac1       | 454 | --LFQPGRYLPYHVAGGG-ESVAM--MGNISNFYPASPLLSQRSDIPD--DQICSIADRE   | 506 |
| TcLac1       | 442 | ---YHKDPHYGFHNVTNTTLQNLTPQLNYISMK LQSFPLLSQRHQIDA--KMFCNESSVS  | 496 |
| TcLac2A      | 506 | --LFA PNTYNRHLVAPNGDHVISL--IDEISYMAPPAPPLISQYDDIDP--QQFCNGDNRP | 559 |
| SpLOC586543  | 423 | ---FNDADLYPLGPSGPGWGEQTL PQLINNRTFHFPGFPLLSQFDDERA--AEGYDDILC  | 477 |



|              |     |                                                               |     |
|--------------|-----|---------------------------------------------------------------|-----|
| AgMCO1       | 829 | DR-----NCRQEF-CECSHVLQIPLHATVEMVMIDEGF-TFDANHPFHLHGHAFRVVG    | 880 |
| AgMCO2A      | 602 | AD-----CGAN--CMCTHKVDIPLNAIVEVVLVDEVQ-QPNLSHPFHLHGAYNVVGI     | 651 |
| AgMCO3       | 502 | DS-----CSDRQLCTCTHRVKINLGDIVELYILDLTSPVNDLNHPFHLHGYPQMFVEM    | 554 |
| AgMCO4       | 529 | AR-----CKPHHACFCLHRLKVALNDVVEMSLIDDAEVVRDLYHPFHLHGHRFIVTGM    | 581 |
| AgMCO5       | 535 | AY-----CTDDHLFCFTHRMKVKHNVDVIEIVLYDTAEVRQKFYHPFHLHGHRFIVTDS   | 587 |
| AaLac1       | 596 | AD-----CGAN--CMCTHKVDIPLNAIVEVVLVDEVQ-QPNLSHPFHLHGAYNVVGI     | 645 |
| AaLac2       | 514 | ER-----CQTRDHCTCIHRLKIPLHALVELYILDLTPEVNDLNHPFHLHGYPQMFVEM    | 566 |
| AaAAEL007802 | 746 | EQGI---NCREEF-CECSHVQVPLNSTVEMVLIDEGF-TFDANHPFHLHGHAFRVVG     | 799 |
| AaAAEL001632 | 466 | AQ-----CPMERACFCVHRLKVDLNDIVEMSLIDDAEVIRELYHPFHLHGHRFIVTGM    | 518 |
| AaAAEL001640 | 521 | PG-----CDRLHLFCFTHRIKVKLNDIVELTYLDTAYERQNFYHPFHLHGHRFIITDM    | 573 |
| AmLOC724890  | 429 | G-----CVQDY-CACTHVLRVNLDSVVEIILVDEGF-AYDANHPFHLHGYPQMFVEM     | 478 |
| AmLOC410365  | 585 | AD-----CGAN--CMCTHQVDIPHNAVEVVLVDEVQ-QPNLSHPFHLHGAYNVVGI      | 634 |
| AmLOC552811  | 477 | ST-----CTEP---CTCAQIKTKLNNVVELVMYDAIP-QTDLDPFHLHGFAFQVFSV     | 526 |
| BmMCO1       | 587 | ES-----CKEGY-CECSHVLVSVKLSVVEVIVDEGI-TFDANHPFHLHGHSFRVVG      | 637 |
| BmLac2       | 608 | AN-----CGQN--CMCTHKVDIPLNAVVEIVLVDEVQ-IANLSHPFHLHGYSYNVVGI    | 657 |
| DmCG3759     | 761 | DQGI----DCRQEF-CKCHHVLQVPLGAVVEMIIVDEGF-QYYANHPFHLHGNAFRVMGL  | 814 |
| DmCG30437-PA | 631 | AD-----CGPN--CMCTHKIDIPLNAIVEVVLVDEVQ-QPNLSHPFHLHGYPQMFVEM    | 680 |
| DmCG5959     | 536 | AEGR---NCREREL-CECVNVMRLPAYRPLEMVVANYLD---STHPFHLHGFTFRLVVG   | 586 |
| DmCG32557    | 501 | DLGF---NCRQRH-CQCSNVIQVPANQQVEFVIVSSLSQ---TPHPIHLHGYPQMFVEM   | 551 |
| MsLac1       | 598 | EG-----CKEGY-CECPHVLVSVKLSVVEVIVDEGV-TFDANHPFHLHGHSFRVVG      | 648 |
| MsLac2       | 604 | AN-----CGQN--CMCTHKVDIPLNAVVEIVLVDEVQ-ITNLSHPFHLHGAYNVVGI     | 653 |
| PhLac1       | 507 | AK-----CGKAYPCQCVHIERIPLNSVTEILITDEAK-IANLSHPFHLHGQPFYLFGE    | 558 |
| TcLac1       | 497 | N-----CENEY-CECTHVVNIPLGTVVEMVLIDKGY-AYDANHPFHLHGHSFRVVM      | 546 |
| TcLac2A      | 560 | AD-----CQQN--CMCTHKVDIPLNAIVEIVLVDEVQ-QPNLSHPFHLHGAYNVVGI     | 609 |
| SpLOC586543  | 478 | EVEQDGFENCDFEF-CACTQYIKVDLGTLEIILIDVVGAGPFPVNHHPFHLHGHAFRILAQ | 536 |

\* \* \* : \* . : . \* \* \* : \*

|              |     |                                                           |     |
|--------------|-----|-----------------------------------------------------------|-----|
| AgMCO1       | 881 | DRV--SRNTTIEDIRRMDEEG-----RLPRRLK-----RAPIKD              | 912 |
| AgMCO2A      | 652 | GRS-PDSNVKKINLKHALDLD---RRGLLHR-----QYN-----LPPLKD        | 687 |
| AgMCO3       | 555 | SQDR-RVPITLIEIAQNIAR-----QRLLSRN-----TVALPPRKD            | 588 |
| AgMCO4       | 582 | GQLP-QFGTQSEKVDVFER-----ARRYSRTMP-----SDHNPPYKD           | 617 |
| AgMCO5       | 588 | GSFP--SDILTDQIAYLRN-----LRTVRRP-----NAHCPYKD              | 620 |
| AaLac1       | 646 | GRS-PDSNVKKINLKHALDLD---RRGLLHR-----QYN-----LPPLKD        | 681 |
| AaLac2       | 567 | GQDR-STPITMERAQKIAR-----RQSLHRTR-----VTTMPPKDK            | 601 |
| AaAAEL007802 | 800 | ERL--AGNITAEVVKRLDEEG-----KIKRRLK-----GAPIKD              | 831 |
| AaAAEL001632 | 519 | GQLPTRIKHSSEKLRWIKDEELKPVVRRTRGMP-----DGHNPPYKD           | 560 |
| AaAAEL001640 | 574 | GRLP--ESAINSRKYLQG-----RNFTQRP-----NGHNPPFKD              | 606 |
| AmLOC724890  | 479 | ERI--GENVTVDKVKALDKKG-----AIRRNLD-----HAPLKD              | 510 |
| AmLOC410365  | 635 | GRS-PDKNVKKINLKHALDLD---KRGLLNR-----QFN-----LPPAKD        | 670 |
| AmLOC552811  | 527 | GQFWPIRNIQRDINEVIQEH---TERLRRG-----EYK-----NPPGKD         | 563 |
| BmMCO1       | 638 | RRL--ASDTTIEEVKAFDEAG-----LLKRNK-----NAPIKD               | 669 |
| BmLac2       | 658 | GRS-PDQNVKKINLKHALDLD---RRGLLHR-----HLKQGD-----LPPAKD     | 696 |
| DmCG3759     | 815 | ERL--GENVTVEMIKQLDQFN-----LLKRNLD-----NPPVKD              | 846 |
| DmCG30437-PA | 681 | GRS-PDSSVKKINLKHALDLD---RRGLLHR-----QYN-----LPPTKD        | 716 |
| DmCG5959     | 587 | GVLGNLNDLRNIQELDRRG-----RLPRLSEDS-----AAVAKD              | 620 |
| DmCG32557    | 552 | GVLGEQ-KIGQIEQIDKKT-----PLPRAK-----GAPLKD                 | 582 |
| MsLac1       | 649 | RRL--NRTTIEEIKAFDEAG-----LLKRNK-----NAPIKD                | 680 |
| MsLac2       | 654 | GRS-PDQNVKKINLKHALDLD---RRGLLHR-----HLKQGD-----LPPAKD     | 692 |
| PhLac1       | 559 | GDA-DLHGVTINVTVKELE---KQGKLNRYPTSVAVEHNDVEGPVPPKVAARFPAKD | 613 |
| TcLac1       | 547 | ERV--GSHVNVSEILKMDQNG-----QIKRNLV-----DAPLKD              | 578 |
| TcLac2A      | 610 | GRS-PDQNVKKINLKHALDLD---RQGLLHR-----QFN-----LPPAKD        | 645 |
| SpLOC586543  | 537 | GRS--ETGSTKEDIIRLDENG-----GIVRNYD-----NPPEKD              | 568 |

\*\*

|              |     |                                                                |     |
|--------------|-----|----------------------------------------------------------------|-----|
| AgMCO1       | 913 | TVTIPDGGYTIIRFIANNPGYWLFHCHIEFHAEIGMSLVLVKVGDSSEMLPAPANFPTC    | 970 |
| AgMCO2A      | 688 | TIAVPNNGYVVLRFRADNPGFWLFHCHFLFHIVIGMNLILQVGTADLPPVPPNFPTC      | 745 |
| AgMCO3       | 589 | TVSIPSRGYARVRFRADNPGFWLMHCHYEWHAVGMALVLQVGETSEMVKAPADFPKC      | 646 |
| AgMCO4       | 618 | TVSVPSRGYTRIRFRADNPGFWLVHCHFWEHLGIGMSFVLQVGELEDEMKAQPKDFPRC    | 675 |
| AgMCO5       | 621 | TQSI PN RGYV RIRFRADNPGFWLVHCHFWEHLADGMGLVLQIGEPDEMLKPPANFP RC | 678 |
| AaLac1       | 682 | TIAVPNNGYVVLRFRADNPGFWLFHCHFLFHIVIGMNLILQVGTLDLPPVPPNFPTC      | 739 |
| AaLac2       | 602 | TVSVPSKGYTRVRFVADNPGFWLMHCHYEWHAVGMVLVLQVGEPSFVKPPAGFP TC      | 659 |
| AaAAEL007802 | 832 | TVTIPDGGYTIIRFIANNPGYWLFHCHIEFHAEIGMSLVLVKVGDKSEMVAAPHNFPTC    | 889 |
| AaAAEL001632 | 561 | TVSIPSRGYTKIRFRADNPGFWLVHCHFWEHLGIGMSFILQVGEIDQMIKTPPGFP TC    | 618 |
| AaAAEL001640 | 607 | TISIPNEGFVKTRFRASNPGFWFVHCHFWEHLGTGMGLVLQVGEVYQMLKAPPGFPRC     | 664 |
| AmLOC724890  | 511 | TVTVPDGGYTVVRFHANNPGYWLFHCHIEFHAEVGMSLIFKVGGEHKDMLPVPRNFPLC    | 568 |
| AmLOC410365  | 671 | TIAVPNNGYVIFRFRADNPGFWLFHCHFLFHILIGMNLILHVGTADLPPIPPNFPRC      | 728 |
| AmLOC552811  | 564 | TAKIPMGYVIVRFKADNPGWLLHCHF'SWHHITGMELVILVGDENDLPPIPKNFPKC      | 621 |
| BmMCO1       | 670 | TVTVPDGGYTVIRFKADNPGYWLFHCHIEFHVEVGMALVFKVGDHKDMPVPVREFPKC     | 727 |
| BmLac2       | 697 | TIAVPNNGYVILRFRA TNPGFWLLHCHFLFHIVIGMSLVLVQVGTQGDLPVPPNFPTC    | 754 |
| DmCG3759     | 847 | TVTIPDGGYTIIRFEASNPGYWLFHCHIEFHAEIGMALVFKVGNDDQMVPVPE NFPTC    | 904 |
| DmCG30437-PA | 717 | TIAVPNNGYVVLRFRADNPGFWLFHCHFLFHIVIGMNLILQVGTNADLPPVPPGFPTC     | 774 |
| DmCG5959     | 621 | TVQIPGQGYIIVRFISNPNPGFWLYHCHVEAHAVQGMVAVLKIGEDHQMNIPARV-RC     | 677 |
| DmCG32557    | 583 | SVQVPAFGYTILRFYSNSPGYWMFCHISPHSENGMAAVVRVGEDVEMKMCVPS--NC      | 638 |
| MsLac1       | 681 | TVTVPDGGYTVIRFKADNPGYWLFHCHIEFHVEVGMALVFKVGEHKDMAPLPRDFPTC     | 738 |
| MsLac2       | 693 | TIAVPNSGYVILRFRA TNPGFWLLHCHFLFHIVIGMSLVLVQVGTQADLPPVPPGFPTC   | 750 |
| PhLac1       | 614 | TYAVPNSGYSIIRFWATNPGYWLFHCHF EFHALMGMMTIFHVGEPEDLPPVPPGFPKC    | 671 |
| TcLac1       | 579 | TVTVPDGGFTIIRFKATNPGYWLFHCHIEFHVEVGMALVFKIGEDYEMPPVPKDFPQC     | 636 |
| TcLac2A      | 646 | TIAVPNNGYVVLRLRANPNPGFWLFHCHFLFHIVIGMNLVLQVGTADLPPVPPNFPTC     | 703 |
| SpLOC586543  | 569 | TVMTPSGGYTVVEFVAANPGWMLHCHMEDHLEDGMGLVRRVGNQSDLPVPEGFPRC       | 626 |
|              |     | : * *: .: : .***: ** * ** :. :* .: * *                         |     |

Figure S2. Alignment of insect MCO sequences

|              |     |                                                               |     |
|--------------|-----|---------------------------------------------------------------|-----|
| AgMCO1       | 722 | QLNSLNRGPG--AENVITIAETSALDQEDLLLLRNNETDYKFYVYDYFYGKDNPHFVPSL  | 779 |
| AgMCO2A      | 494 | VMNPLDAQCNVQRDDAICVSQLKNAKEIDRALLQDKPDVKIFLPPFRFYLYRPEELFQPNT | 553 |
| AgMCO2B      | 494 | VMNPLDAVCNVPDPDAVCVSNLRNAKADKAVLSEKPDVKIFLPPFRFYLYRPEELFQPNT  | 553 |
| AaLac1       | 488 | VLNPLDAQCNVQRDDAICVSQLKNAKIDRALLQEKPDVKIFLPPFRFYLYRPEELFQPNT  | 547 |
| AaAAEL007415 | 488 | VLNPLDAVCNVPDPDAICVSNLRSAKKLDKAVLTERPDVKIFLPPFRFYLYRPEELFQPNT | 547 |
| AmLOC410365  | 477 | VLNPLDAICNRQREDAICVSQLKNARQIDQGILQQRPDVKIFLPPFRFYLYRPEELFQPNT | 536 |
| BmLac2A      | 500 | VMNPLDARCNISRNDAICVSQLKNAQNIDPAIQERPDVKIFLPPFRFYLYRPEELFQPNT  | 559 |
| BmLac2B      | 499 | VMNPLDAICDVKRNDAVCVSNLKSARPVDKALLQDRPDVKIFLPPFRFYLYRPEELFQPNT | 558 |
| DmCG30437-PA | 523 | VMNPLDAQCNRQRNDICVSQLKNALEIDRGILAEKPDVKIFLPPFRFYLYRPEELFQPNT  | 582 |
| DmLac2B      | 523 | ILNPLDAICDRKRADAVCVSNLKNAKKVDKGVLVERPDVKIFLPPFRFYLYRPEELFQPNT | 582 |
| TcLac2A      | 452 | VLNPLDARCNEIRPDICVSQLKNALSIDKILREKPDVKIFLPPFRFYLYRPEELFQPNT   | 511 |
| TcLac2B      | 452 | VLNPLDAICNKPRKDAVCVSQLRNAKKVDEAILEERPDVKIFLPPFRFYLYRPEELFQPNT | 511 |

:.\*: . :.: :.: \* :\* :.\* \*::: : \* .. .

|              |     |                                                               |     |
|--------------|-----|---------------------------------------------------------------|-----|
| AgMCO1       | 780 | YGFQQVNNNTNRLYTPQLNHISMRMPVPFPLPGKDVLEDSQFCNETSVRDRNCRQEFCEC  | 839 |
| AgMCO2A      | 554 | YNRFLVAPTGDHVIS-LIDEISYLSAPAPLLSQYDDINPEQFCNGD-NRPADCGAN-CMC  | 610 |
| AgMCO2B      | 554 | YNKFLVAPGGDHLIS-LIDEISYVSPSPMLSQINDIPPEQFCNGD-NRPPDCGPN-CMC   | 610 |
| AaLac1       | 548 | YNRFLVAPTGDHVIS-LIDEISYLSAPAPLLSQYDDINPEQFCNGD-NRPADCGAN-CMC  | 604 |
| AaAAEL007415 | 548 | YNKFLVAPGGDHLIS-LIDEISYVSPSPMLSQIEDIPPEQFCNGD-NRPPDCGPN-CMC   | 604 |
| AmLOC410365  | 537 | YNRFLVAPTGDHVIS-LVDEISFTFPPAPPLSQIDDIPPEQFCNGD-NRPADCGAN-CMC  | 593 |
| BmLac2A      | 560 | YNRFLVAPGGDHLIS-LIDEISYMSPPAPPLISQYDDINPDQFCNGD-NRPNACGQN-CMC | 616 |
| BmLac2B      | 559 | YRNFLVAPGGDHVLS-LVDEISYSAPPAPPLSQMHESPLDFCNGD-NRPPNCAVD-CRC   | 615 |
| DmCG30437-PA | 583 | YNRFLVAPTGDHVIS-LIDEISYLSAPAPLTSQYNDINPDQFCNGD-NRPADCGPN-CMC  | 639 |
| DmLac2B      | 583 | YNRFLVVPDGDHLIS-LVDEISYISPPAPPLSQIDDIPPEYFCNGD-NRPPNCGPN-CEC  | 639 |
| TcLac2A      | 512 | YNRHLVAPNGDHVIS-LIDEISYMAPAPPLISQYDDIDPDQFCNGD-NRPADCGQN-CMC  | 568 |
| TcLac2B      | 512 | YNRFLAATGGDHVIS-LIDEISFTFPPSPPLSQIHDLSPDQFCNGD-NRPPDCGQN-CMC  | 568 |

\* .. :.: : :.:\*\* . \* \* . . : . \*\*\* \* : \* : \* \*

|              |     |                                                                |     |
|--------------|-----|----------------------------------------------------------------|-----|
| AgMCO1       | 840 | SHVLQIPLHATVEMVMIDEGFTFDANHPFHHLGHAFRVVGMDRVSV---RNTTIEDIRRM   | 895 |
| AgMCO2A      | 611 | THKVDIPLNAIVEVVLVDEVQPNLSHPFHLHGAYYVNVVIGRSPDSNVKKINLKHALLDL   | 670 |
| AgMCO2B      | 611 | THKVDIPLNAIVEVVLVDEVQQENLSHPFHLHGAFHVIIGMGRSPDSTVKKINLRHTLDL   | 670 |
| AaLac1       | 605 | THKVDIPLNAIVEVVLVDEVQPNLSHPFHLHGAYYVNVVIGRSPDSNVKKINLKHALLDL   | 664 |
| AaAAEL007415 | 605 | THTVDIPLNAIVEVVLVDEVQPNLSHPFHLHGHSFNVIIGMGRSPDSTVKKINLRKHALLDL | 664 |
| AmLOC410365  | 594 | THQVDIPLNAVVEVVLVDEVQPNLSHPFHLHGAYYVNVVIGRSPDSNVKKINLKHALLDL   | 653 |
| BmLac2A      | 617 | THKVDIPLNAVVEIVLVDEVQIANLSHPFHLHGYSYVNVVIGRSPDQNVKKINLKHALLDL  | 676 |
| BmLac2B      | 616 | THMIDVPLNSIVEIVLVDEVQPNLSHPFHLHGYSYVNVVIGMGRSPDKNIKKINLKHALLDL | 675 |
| DmCG30437-PA | 640 | THKIDIPLNAIVEVVLVDEVQPNLSHPFHLHGYSYVNVVIGRSPDSNVKKINLKHALLDL   | 699 |
| DmLac2B      | 640 | THMVDIPLGAIIVEVVLVDEVQPNLSHPFHLHGTAFAVYVGLGRSPDKSIKKINLKHALLDL | 699 |
| TcLac2A      | 569 | THKVDIPLNAIVEIVLVDEVQPNLSHPFHLHGAYYVNVVIGRSPDQNVKKINLKHALLDL   | 628 |
| TcLac2B      | 569 | THQVDIPLNAIVEVVLVDEVQPNLSHPFHLHGAYYVNVVIGRSPDQNVKKINLKHALLDL   | 628 |

:\* :.:\* : \*\*:\*:\*\*\* : .\*\*\*\*\* .: \*:::\* . :. :. . :

|              |     |                                                               |     |
|--------------|-----|---------------------------------------------------------------|-----|
| AgMCO1       | 896 | DEEGRLEPRRLK---RAPIKDVTIPDGGYTIIRFIANNPGYWLFHCHIEFHAEIGMSLVL  | 952 |
| AgMCO2A      | 671 | DRRGLLHRQYN---LPPLKDTIAVPNNGYVVLFRADNPGFWLFHCHFLFHIVIGMNLIL   | 727 |
| AgMCO2B      | 671 | DRRGLLNRQFN---LPPLKDTIAVPNNGYVVLFRADNPGFWLFHCHFLFHIVIGMNLIV   | 727 |
| AaLac1       | 665 | DRRGLLHRQYN---LPPLKDTIAVPNNGYVVLFRADNPGFWLFHCHFLFHIVIGMNLIL   | 721 |
| AaAAEL007415 | 665 | DRRGLLNRQFN---LPPLKDTIAVPNNGYVVMFRANPNPGYWLFHCHFLFHIVIGMNLIV  | 721 |
| AmLOC410365  | 654 | DKRGLLNRQFN---LPPAKDTIAVPNNGYVIFRFRADNPGYWLFHCHFLFHILIGMNLIL  | 710 |
| BmLac2A      | 677 | DRRGLLERHLKQGDLPAPKDTIAVPNNGYVILFRATNPGFWLLHCHFLFHIVIGMSLVL   | 736 |
| BmLac2B      | 676 | DRKGLLHRQYN---LPPHKDTLAVPNNNGYVVLRLKADNPGYWLFHCHFLFHIVIGMSLVL | 732 |
| DmCG30437-PA | 700 | DRRGLLHRQYN---LPPTKDTIAVPNNGYVVLFRADNPGFWLFHCHFLFHIVIGMNLIL   | 756 |
| DmLac2B      | 700 | DQMGMLERHFS---KPPKDTIAVPNNGYVIFRFRADNPGYWLFHCHFLFHIVIGMNLIF   | 756 |
| TcLac2A      | 629 | DRQGLLHRQFN---LPPAKDTIAVPNNGYVVLRLRANPNPGFWLFHCHFLFHIVIGMNLIV | 685 |
| TcLac2B      | 629 | DRRGLLHRQFN---LPPSKDTIAVPNNGYVIFRFRADNPGYWLFHCHFLFHIVIGMNLII  | 685 |

\* . \* \* \* : . \* \* \* : : \* : \* \* : : \* \* \* \* \* : \* \* \* \* \* : \* \* \* \* \* :

|              |     |                                      |     |
|--------------|-----|--------------------------------------|-----|
| AgMCO1       | 951 | KVGDSSEMLPAPANFPTCYDFKPKLGQLGSGGARHG | 988 |
| AgMCO2A      | 728 | QVGTHADLPPVPPNFPTCGDHLPPIN-----      | 753 |
| AgMCO2B      | 728 | HIGTHADLPPVPPNFPRCGNHIPPIKYN-----    | 755 |
| AaLac1       | 722 | QVGTLDLPPVPPNFPTCGDHLPIQ-----        | 747 |
| AaAAEL007415 | 722 | HVGSKADLPPVPPNFPRCGNHIPPIRFN-----    | 749 |
| AmLOC410365  | 711 | HVGTHADLPIPPNFPRCGDHLPAITPPSLSLDSFH  | 746 |
| BmLac2A      | 737 | QVGTQGDLPVPPNFPTCGDHLPAIPLH-----     | 764 |
| BmLac2B      | 733 | HIGTQGDLPVPPNFPRCGHHLPTISPPFYPIH---  | 765 |
| DmCG30437-PA | 757 | QVGTNADLPPVPPGFPTCGDHTPSIPIN-----    | 784 |
| DmLac2B      | 757 | HIGTTADLPPVPPRFPTCGDHVPPVTWY-----    | 784 |
| TcLac2A      | 686 | QVGTHADLPPVPPNFPTCGDHVPEINSNPNLV---- | 717 |
| TcLac2B      | 686 | HVGTQLIYRPFS-HFPRCGNHLPPISLH-----    | 712 |
|              |     | ::*           * .   ** *   .. *      |     |

Figure S3. Alignment of MCO2 isoforms.
